# Supplementary material for: Clock gene-dependent glutamate dynamics in the bean bug brain regulate photoperiodic reproduction
Source: PubMed Central journal article supplement (PMC9447885; doi:10.1371/journal.pbio.3001734), 2022-09-06

Fig6C

50 bp DNA ladder  
(NE-MWD50,  
Nippon Genetics)

*tubulin*

*gluc1*

500bp

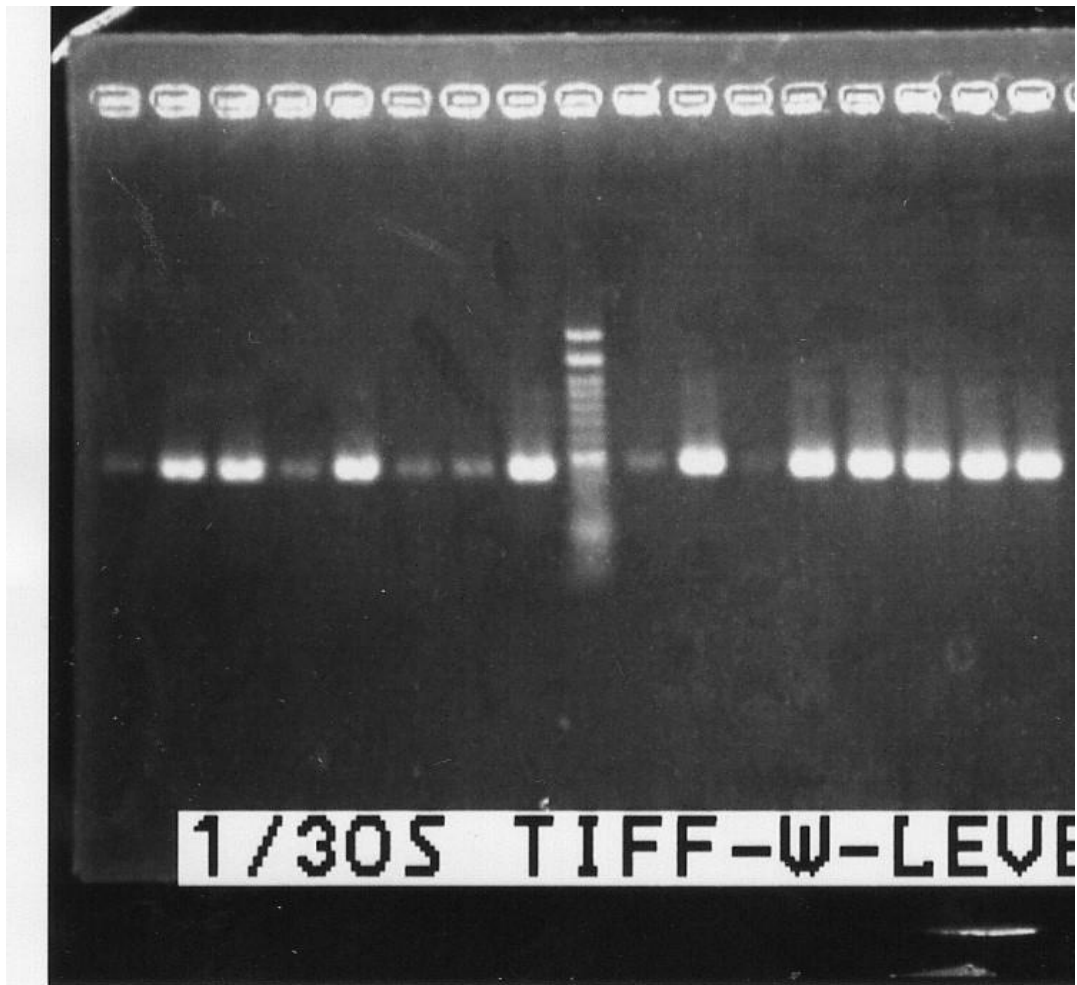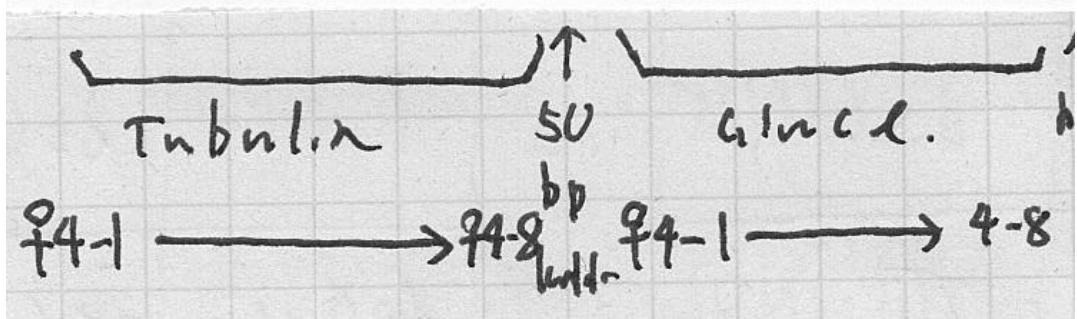

Supplement: pbio.3001734.s014.pdf [file pbio.3001734.s014.pdf]
