# Supplementary material for: Clock gene-dependent glutamate dynamics in the bean bug brain regulate photoperiodic reproduction
Source: PLoS Biol. 2022 Sep 6;20(9):e3001734. doi: 10.1371/journal.pbio.3001734 (PMC9447885; doi:10.1371/journal.pbio.3001734)
Supplement: S1 Data — (XLSX) [file pbio.3001734.s013.xlsx]

## Sheet: Figure 1B-D
Figure 1B							Figure 1C				Figure 1D
	Day time (ZT3-5) sampling			Night time (ZT16-18) sampling				Glutamate concentration (µM)				Glutamate concentration (µM)
	Glutamate concentration (µM)			Glutamate concentration (µM)				MEM+Saline (N=12)	MEM+TTX (N=13)			dsbla		dsper
	Long-day (N=21)	Short-day (N=21)		Long-day (N=18)	Short-day (N=18)			391.125	47.1078			Long-day (N=10)	Short-day (N=11)	Long-day (N=13)	Short-day (N=13)
	181.741	69.0608		190.622	367.565			398.409	0			31.4505	164.694	115.631	373.293
	335.75	347.818		231.297	293.63			272.211	53.7414			38.7658	157.045	94.3514	583.914
	58.3509	403.128		239.37	181.667			243.478	76.7457			427.153	169.423	225.644	182.468
	317.443	34.6892		182.264	290.476			166.095	63.5647			172.801	244.093	180.842	205.947
	244.535	692.75		49.435	154.78			268.754	42.0603			141.761	398.226	29.9602	251.226
	123.715	306.439		173.533	247.825			970.349	49.2802			0	233.788	555.615	219.407
	73.5	627.52		121.089	182.923			195.381	18.806			103.401	1234.84	136.898	18.1745
	61.4518	473.284		162.561	259.126			219.803	29.9959			24.4318	891.448	4.35377	153.542
	664.925	420.116		45.7886	224.63			156.34	112.045			250.65	259.123	105.344	233.599
	184.472	328.393		167.614	181.785			180.709	107.049			104.523	332.855	65.7594	336.396
	57.6157	81.1696		148.322	251.517			408.693	127.016				237.159	377.599	210.591
	47.1574	78.4241		166.273	159.669				59.6107					230.473	40.5
	35.412	63.1161		110.496	112.14									353.986	366.214
	47.9259	155.219		186.306	449.483
	133.338	86.125		140.388	620.5
	72.2778	666.982		69.0868	217.574
	234.759	114.196		372.145	545.897
	0	217.554		145.029	170.649
	150.009	180.094
	246.058	330.531
	159.987	158.076

## Sheet: Figure 2A
Figure 2A
	Glutamate concentration (µM)
	dsbla		dsgot		dsgs
	Long-day (N=19)	Short-day (N=16)	Long-day (N=21)	Short-day (N=19)	Long-day (N=16)	Short-day (N=13)
	186.57	323.338	113.461	115.066	620.934	159.535
	133.338	282.654	224.64	142.14	431.399	245.408
	38.2061	187.092	126.018	134.737	113.496	200.868
	231.531	406.935	138.829	53.8089	1215.75	1335.51
	175.13	202.093	108.752	23.7724	168.679	361.077
	69.8455	1349.34	65.6382	39.1864	491.573	351.771
	104.142	878.055	132.959	126.242	1296.39	591.36
	22.7712	855.758	151.915	74.411	806.712	1146.78
	60.6822	972.364	42.1822	156.983	819.958	610.093
	93.3475	726.471	152.076	18.1907	1296.14	596.332
	79.0297	300.353	130.979	33.3008	1222.34	1358.27
	226.551	601.777	575.237	37.979	460.786	223.551
	137.525	686.722	51.1356	23.9916	237.966	1151.46
	87.895	432.786	36.4454	53.9748	284.359
	14.9538	481.983	83.0126	192.462	183.679
	155.403	144.41	58.7605	39.7564	138.197
	21.8504		30.979	14.7137
	24.3547		39.3333	112.457
	16.9103		167.333	51.2821
			106.551
			82.0085

## Sheet: Figure 2B, C
Figure 2B
	Ovarian development
		dsbla		dsgot		dsgs
		Long-day (N=17)	Short-day (N=17)	Long-day (N=16)	Short-day (N=16)	Long-day (N=16)	Short-day (N=16)
	Diapause	0	16	2	8	6	13
	Non-diapause (ovarian development)	17	1	14	8	10	3
	Proportion of ovarian development (%)	100	5.88235	87.5	50	62.5	18.75
Figure 2C
	Oviposition
		dsbla		dsgot		dsgs
		Long-day (N=17)	Short-day (N=17)	Long-day (N=16)	Short-day (N=16)	Long-day (N=16)	Short-day (N=16)
	Non-oviposition	1	15	4	10	8	14
	Oviposition	16	2	12	6	8	2
	Proportion of oviposition (%)	94.1176	11.7647	75	37.5	50	12.5

## Sheet: Figure 2D
Figure 2D
	Total number of eggs laid
	dsbla		dsgot		dsgs
	Long-day (N=17)	Short-day (N=17)	Long-day (N=16)	Short-day (N=16)	Long-day (N=16)	Short-day (N=16)
	0	0	7	0	12	0
	7	0	0	0	0	0
	21	0	21	0	0	0
	12	0	8	0	13	0
	24	0	19	0	0	11
	10	8	0	5	5	0
	37	0	7	49	7	0
	5	2	18	3	0	0
	21	0	21	3	1	3
	23	0	28	7	0	0
	5	0	31	0	3	0
	21	0	18	0	0	0
	4	0	2	0	18	0
	70	0	19	0	4	0
	13	0	0	0	0	0
	34	0	0	5	0	0
	3	0

## Sheet: Figure 3B
Figure 3B
	Firing pattern
		dsbla		dsgot		dsgs
		Long-day (n=16)	Short-day (n=16)	Long-day (n=15)	Short-day (n=15)	Long-day (n=17)	Short-day (n=16)
	Burst	11 (68.75%)	2 (12.5%)	7 (46.67%)	6 (40%)	6 (35.29%)	4 (25%)
	Non-burst	4 (25%)	1 (6.25%)	3 (20%)	3 (20%)	3 (17.65%)	3 (18.75%)
	Silent	1 (6.25%)	13 (81.25%)	5 (33.33%)	6 (40%)	8 (47.06%)	9 (56.25%)

## Sheet: Figure 3C, D
Figure 3C
	Mean instantaneous frequency (Hz)
	dsbla		dsgot		dsgs
	Long-day (n=16)	Short-day (n=16)	Long-day (n=15)	Short-day (n=15)	Long-day (n=17)	Short-day (n=16)
	4.43199	0	6.69277	9.04785	8.14064	0.564227
	5.85792	0	3.58115	1.56201	0.385026	0.644413
	0.777043	0	0	0	0	2.80554
	4.84827	0	16.2689	0	3.87245	7.59402
	0.701467	0	0	7.70005	8.66308	0
	0	3.44316	0.936684	5.05688	0	0
	9.3678	6.24318	3.95768	2.26107	7.49498	6.5832
	2.70975	0	4.47856	0	5.78726	5.44873
	10.5568	0	3.84487	1.80571	0	0
	0.480076	5.85	0	3.48371	0.101324	0
	5.09475	0	1.46818	0	1.31182	0
	4.06634	0	0	5.40335	0	0
	19.8883	0	5.39115	5.69937	7.92533	8.81388
	14.1839	0	0	0	0	0
	7.66312	0	0.948575	0	0	0
	5.80393	0			0	0
					0
Figure 3D
	Number of firing in 5-min
	dsbla		dsgot		dsgs
	Long-day (n=16)	Short-day (n=16)	Long-day (n=15)	Short-day (n=15)	Long-day (n=17)	Short-day (n=16)
	824	0	1999	1266	2427	57
	1716	0	674	426	12	164
	11	0	0	0	0	575
	1162	0	95	0	677	2267
	145	0	0	2122	2552	0
	0	382	46	1437	0	0
	2683	1044	22	205	1852	1882
	72	0	737	0	76	1451
	519	0	910	42	0	0
	55	255	1	813	3	0
	217	0	11	0	37	0
	16	0	1	465	0	0
	256	0	131	1607	182	963
	3502	0	0	0	0	0
	1766	0	6	0	0	0
	438	0			0	0
					0

## Sheet: Figure 4C, D
Figure 4C
	Instantaneous frequency (Hz)
		Before	L-Glutamate	Wash-out
	Trial 1	5.94374	0	5.65433
	Trial 2	8.39438	0	18.9508
	Trial 3	5.63432	0	50.2943
	Trial 4	18.1129	0	21.6176
	Trial 5	10.0075	0	17.0808
	Trial 6	6.27672	0	0
	Trial 7	15.7217	0	0
	Trial 8	5.2247	0	1.40302
	Trial 9	1.19847	0	7.98032
Figure 4D
	Number of firing
		Before	L-Glutamate	Wash-out
	Trial 1	548	0	290
	Trial 2	150	0	176
	Trial 3	515	0	329
	Trial 4	2015	0	1783
	Trial 5	321	0	644
	Trial 6	637	0	0
	Trial 7	717	0	0
	Trial 8	55	0	2
	Trial 9	4	0	183

## Sheet: Figure 5C
Figure 5C
	Normal intracellular solution
	Peak current (pA)
		ー80mV	ー60mV	ー40mV	ー20mV
	Trial 1	-116.3	233.2	723	726.6
	Trial 2	-246.6	177.9	494.4	919.2
	Trial 3	-237.1	11.9	61.3	599.7
	Trial 4	-311.3	-16.1	417.4	525.5
	Trial 5	-36.4	31.4	128.2	271.6
	High Cl- solution
	Peak current (pA)
		ー80mV	ー60mV	ー40mV	ー20mV	0mV
	Trial 1	-658	-435.8	-237.7	-174	58.3
	Trial 2	-294.5	-320.5	-37.5	-9.5	33.2
	Trial 3	-287.5	-243.8	-188	-97.6	-43.9
	Trial 4	-203	-91.2	-87.3	-59.8	-4.3
	Trial 5	-195.9	-40.3	-97.9	-44.2	6.7

## Sheet: Figure 6B
Figure 6B
	Induced current peak (pA)
		1st L-Glutamate	L-Glutamate + Picrotoxin	2nd L-Glutamate
	Trial 1	110.8	21	16.5
	Trial 2	262.1	46.7	131.9
	Trial 3	196	70.5	119.9
	Trial 4	464.2	109.6	295.1
	Trial 5	250.3	7.7	22.3
	Trial 6	124.6	58.3	201.4

## Sheet: Figure 7A, B
Figure 7A
	Ovarian development
		dsbla		dsglucl
		Long-day (N=28)	Short-day (N=28)	Long-day (N=24)	Short-day (N=26)
	Diapause	0	21	2	3
	Non-diapause (ovarian development)	28	7	22	23
	Proportion of ovarian development (%)	100	25	91.6667	88.4615
Figure 7B
	Oviposition
		dsbla		dsglucl
		Long-day (N=28)	Short-day (N=28)	Long-day (N=24)	Short-day (N=26)
	Non-oviposition	0	20	2	1
	Oviposition	28	8	22	25
	Proportion of oviposition(%)	100	28.5714	91.6667	96.1538

[truncated: 10 more sheets: Figure 7C, Figure 7D, Figure 7E, F, Fig S1A, B, Fig S2, Fig S3, Fig S5A, B, Fig S6B, C, Fig S8, Fig S10]
